# Supplementary material for: Comparison of Persistent Symptoms After COVID-19 and Other Non-SARS-CoV-2 Infections in Children
Source: Frontiers journal article supplement (doi:10.3389/fped.2021.752385), 2021-10-29
Supplement: Data_Sheet_1.PDF [file Data_Sheet_1.PDF]

## Post-non-SARS-CoV-2 infection symptom assessment questionnaire

| Part I: General information, the acute disease phase |                                                                                                                                                                                                                                                                                                            |                                                                                                                                                                  |  |       |
|------------------------------------------------------|------------------------------------------------------------------------------------------------------------------------------------------------------------------------------------------------------------------------------------------------------------------------------------------------------------|------------------------------------------------------------------------------------------------------------------------------------------------------------------|--|-------|
| 1.                                                   | Family doctor, telephone number                                                                                                                                                                                                                                                                            |                                                                                                                                                                  |  |       |
| 2.                                                   | Date of consultation                                                                                                                                                                                                                                                                                       |                                                                                                                                                                  |  |       |
| 3.                                                   | Patient number                                                                                                                                                                                                                                                                                             |                                                                                                                                                                  |  |       |
| 4.                                                   | Age                                                                                                                                                                                                                                                                                                        | Months                                                                                                                                                           |  | Years |
| 5.                                                   | Sex                                                                                                                                                                                                                                                                                                        | Female                                                                                                                                                           |  | Male  |
| 6.                                                   | Day of first symptoms with current infection?                                                                                                                                                                                                                                                              |                                                                                                                                                                  |  |       |
| 7.                                                   | Does the child have any comorbidities?<br>(Rheumatological, cardiological, respiratory, immunodeficiency, diabetes etc.)                                                                                                                                                                                   | Yes ( <i>please specify</i> )                                                                                                                                    |  |       |
|                                                      |                                                                                                                                                                                                                                                                                                            | No                                                                                                                                                               |  |       |
| 8.                                                   | Is the child taking medication to treat any chronic diseases?                                                                                                                                                                                                                                              | Yes ( <i>please specify</i> )                                                                                                                                    |  |       |
|                                                      |                                                                                                                                                                                                                                                                                                            | No                                                                                                                                                               |  |       |
| 9.                                                   | Has vaccination been completed following the Latvian immunisation calendar?                                                                                                                                                                                                                                | Full immunisation                                                                                                                                                |  |       |
|                                                      |                                                                                                                                                                                                                                                                                                            | Please clarify: did the child receive the BCG vaccination?                                                                                                       |  |       |
|                                                      |                                                                                                                                                                                                                                                                                                            | Please clarify: Did the child receive the MMR vaccination?                                                                                                       |  |       |
|                                                      |                                                                                                                                                                                                                                                                                                            | Partial immunisation                                                                                                                                             |  |       |
|                                                      |                                                                                                                                                                                                                                                                                                            | No vaccination                                                                                                                                                   |  |       |
| 10.                                                  | Has the child received immunisation against influenza for this flu season?                                                                                                                                                                                                                                 | Yes                                                                                                                                                              |  |       |
|                                                      |                                                                                                                                                                                                                                                                                                            | No                                                                                                                                                               |  |       |
|                                                      | <b>Interview</b> with Mother/ Father/Other<br><br><b>Mother</b> – Basic education/Secondary education/ Higher education/Unfinished higher education/ Vocational education.<br><br><b>Father</b> – Basic education/Secondary education/ Higher education/Unfinished higher education/ Vocational education. | <b>Mother</b> – Married /Living together / Divorced /Other family/Separated<br><br><b>Father</b> – Married /Living together / Divorced/ Other family / Separated |  |       |
| 11.                                                  | 11.1 Most common symptoms                                                                                                                                                                                                                                                                                  | Fever (temperature measured axillary):                                                                                                                           |  |       |
|                                                      |                                                                                                                                                                                                                                                                                                            | ○ 37,5 – 38,0 °C<br>○ 38,1 – 39,0 °C<br>○ 39,0 °C                                                                                                                |  |       |
|                                                      |                                                                                                                                                                                                                                                                                                            | Cough                                                                                                                                                            |  |       |
|                                                      |                                                                                                                                                                                                                                                                                                            | Sore throat                                                                                                                                                      |  |       |
|                                                      |                                                                                                                                                                                                                                                                                                            | Sneezing                                                                                                                                                         |  |       |
|                                                      |                                                                                                                                                                                                                                                                                                            | Shortness of breath                                                                                                                                              |  |       |
|                                                      |                                                                                                                                                                                                                                                                                                            | Wheezing                                                                                                                                                         |  |       |
|                                                      |                                                                                                                                                                                                                                                                                                            | Muscle pain                                                                                                                                                      |  |       |

## Post-non-SARS-CoV-2 infection symptom assessment questionnaire

|                      |                           |                                      |                                       |                                    |  |
|----------------------|---------------------------|--------------------------------------|---------------------------------------|------------------------------------|--|
|                      | 11.2 Other symptoms       |                                      |                                       | Fatigue                            |  |
|                      |                           |                                      |                                       | Headache                           |  |
|                      |                           |                                      |                                       | Rhinorrhoea                        |  |
|                      |                           |                                      |                                       | Stuffy nose                        |  |
|                      |                           |                                      |                                       | Loss of taste/smell                |  |
|                      |                           |                                      |                                       | Tachypnoea                         |  |
|                      |                           |                                      |                                       | Tachycardia                        |  |
|                      |                           |                                      |                                       | Oxygen saturation <92%             |  |
|                      |                           |                                      |                                       | Abdominal pain                     |  |
|                      |                           |                                      |                                       | Diarrhoea                          |  |
|                      |                           |                                      |                                       | Vomiting                           |  |
|                      |                           |                                      |                                       | Nausea                             |  |
| Other                |                           |                                      |                                       |                                    |  |
| <b>Investigation</b> |                           |                                      |                                       |                                    |  |
| <b>12.</b>           | 12.1                      | Have not been performed              |                                       |                                    |  |
|                      | 12.2                      | Have been done (please, mark which): |                                       |                                    |  |
|                      | 12.2.1                    | COVID-19 PCR test                    | Done                                  | Negative                           |  |
|                      | 12.2.2                    | Full blood count                     | Done                                  | Any abnormalities? Please specify. |  |
|                      | 12.2.3                    | CRP                                  | Done                                  | CRP value (mg/dL):                 |  |
|                      | 12.2.4                    | Rapid Strep A test                   | Done                                  | Positive                           |  |
|                      |                           |                                      |                                       | Negative                           |  |
|                      | 12.2.5                    | Rapid Influenza antigen test         | Done                                  | Positive                           |  |
|                      |                           |                                      |                                       | Negative                           |  |
|                      | 12.2.6                    | Rapid RSV antigen test               | Done                                  | Positive                           |  |
|                      |                           |                                      |                                       | Negative                           |  |
|                      | 12.2.7                    | Chest X-ray                          | Done                                  | Any abnormalities? Please specify. |  |
| 12.2.8               | Others (please, specify)  |                                      |                                       |                                    |  |
| <b>Treatment</b>     |                           |                                      |                                       |                                    |  |
| <b>13.</b>           | <b>Type of treatment:</b> |                                      | How many days did the treatment last? |                                    |  |
|                      | Peroral rehydration       |                                      |                                       |                                    |  |
|                      | Antipyretic treatment     |                                      |                                       |                                    |  |
|                      | Inhalations               |                                      |                                       |                                    |  |
|                      | Antibacterial therapy     |                                      |                                       |                                    |  |
|                      | Intravenous rehydration   |                                      |                                       |                                    |  |
|                      | Other                     |                                      |                                       |                                    |  |

| Part II: Non-SARS-CoV-2 patient follow-up                                 |                |                     |                   |                    |                    |
|---------------------------------------------------------------------------|----------------|---------------------|-------------------|--------------------|--------------------|
| 14. Did the child have any other acute infections following this episode? |                | 1–3-month follow-up | 6-month follow-up | 12-month follow-up | 24-month follow-up |
| Date of consultation                                                      |                |                     |                   |                    |                    |
| Yes                                                                       | Please specify |                     |                   |                    |                    |

## Post-non-SARS-CoV-2 infection symptom assessment questionnaire

|                                                                                               |                                   |  |  |  |  |
|-----------------------------------------------------------------------------------------------|-----------------------------------|--|--|--|--|
| No                                                                                            |                                   |  |  |  |  |
| 14.1 Received treatment during illness                                                        |                                   |  |  |  |  |
|                                                                                               | - Antibacterial therapy           |  |  |  |  |
|                                                                                               | - P/o rehydration                 |  |  |  |  |
|                                                                                               | - Antipyretic therapy             |  |  |  |  |
|                                                                                               | - Inhalations                     |  |  |  |  |
|                                                                                               | - Other                           |  |  |  |  |
| 15. What kind of medications/vitamins does the child receive daily?                           |                                   |  |  |  |  |
| 16. Has the child received a vaccine against influenza in the autumn/winter season 2020/2021? |                                   |  |  |  |  |
| 17. Does the child have any persistent symptoms following acute infection episode?            |                                   |  |  |  |  |
| <b>Catarrhal symptoms</b>                                                                     |                                   |  |  |  |  |
| 18.1 Elevated body temperature                                                                |                                   |  |  |  |  |
|                                                                                               | - How many degrees (C°)?          |  |  |  |  |
|                                                                                               | - How often was the T measured?   |  |  |  |  |
| 18.2 Cough                                                                                    |                                   |  |  |  |  |
| 18.3 Sore throat                                                                              |                                   |  |  |  |  |
| 18.4 Wheezing                                                                                 |                                   |  |  |  |  |
| 18.5 Rhinorrhoea                                                                              |                                   |  |  |  |  |
| 18.6 Shortness of breath                                                                      |                                   |  |  |  |  |
|                                                                                               | - In a resting state              |  |  |  |  |
|                                                                                               | - While doing physical activities |  |  |  |  |
| 18.7 Enlarged lymph nodes                                                                     |                                   |  |  |  |  |
| <b>Otorhinolaryngological sequelae</b>                                                        |                                   |  |  |  |  |
| 19.1 Difficulty swallowing                                                                    |                                   |  |  |  |  |
| 19.2 Voice changes                                                                            |                                   |  |  |  |  |

## Post-non-SARS-CoV-2 infection symptom assessment questionnaire

|                                                        |                                                                          |  |  |  |  |
|--------------------------------------------------------|--------------------------------------------------------------------------|--|--|--|--|
| 19.3 Speech disturbances                               |                                                                          |  |  |  |  |
| 19.4 Tinnitus                                          |                                                                          |  |  |  |  |
| <b>Cardiovascular sequelae</b>                         |                                                                          |  |  |  |  |
| 20.1 Heart rhythm disturbances (including tachycardia) |                                                                          |  |  |  |  |
| 20.2 Orthostatic intolerance                           |                                                                          |  |  |  |  |
| 20.3 Tachypnoea                                        |                                                                          |  |  |  |  |
| <b>Gastrointestinal sequelae</b>                       |                                                                          |  |  |  |  |
| 21.1 Diarrhoea                                         |                                                                          |  |  |  |  |
| 21.2 Vomiting/nausea                                   |                                                                          |  |  |  |  |
| 21.3 Loss of appetite                                  |                                                                          |  |  |  |  |
| 21.4 Body weight changes                               |                                                                          |  |  |  |  |
| <b>Musculoskeletal sequelae</b>                        |                                                                          |  |  |  |  |
| 22.1 Muscle pain                                       |                                                                          |  |  |  |  |
| 22.2 Muscle spasms                                     |                                                                          |  |  |  |  |
| 22.3 Joint pain                                        |                                                                          |  |  |  |  |
| 22.4 Stiffness                                         |                                                                          |  |  |  |  |
| <b>Exercise intolerance</b>                            |                                                                          |  |  |  |  |
| 23. Exercise Intolerance                               |                                                                          |  |  |  |  |
|                                                        | - Which physical activities can't be done?                               |  |  |  |  |
|                                                        | - How long can physical activity be tolerated (minutes)?                 |  |  |  |  |
|                                                        | - Does the physical activity provoke increased fatigue/sleepiness?       |  |  |  |  |
|                                                        | - Do the symptoms disappear when lying down?                             |  |  |  |  |
|                                                        | - Is it hard to walk for longer than 15 minutes?                         |  |  |  |  |
|                                                        | - Is it hard to get up more than two flights of stairs?                  |  |  |  |  |
|                                                        | - Is there any physical activity that is more difficult than previously? |  |  |  |  |

## Post-non-SARS-CoV-2 infection symptom assessment questionnaire

| Day-to-day activities and sleep disorders |                                                                                                                   |  |  |  |  |
|-------------------------------------------|-------------------------------------------------------------------------------------------------------------------|--|--|--|--|
| 24. Increased fatigue                     |                                                                                                                   |  |  |  |  |
|                                           | - Are there any provoking factors which amplify fatigue?                                                          |  |  |  |  |
|                                           | - How many hours a night does the child sleep?                                                                    |  |  |  |  |
|                                           | - Is the child tired in the morning, despite a good night's sleep?                                                |  |  |  |  |
|                                           | - Are there any day-to-day activities (dressing, washing etc.) that are more difficult now than they were before? |  |  |  |  |
| 25. Night sweating                        |                                                                                                                   |  |  |  |  |
| Neurological sequelae                     |                                                                                                                   |  |  |  |  |
| 26.1 Loss of taste and/or smell           |                                                                                                                   |  |  |  |  |
| 26.2 Dizziness                            |                                                                                                                   |  |  |  |  |
| 26.3 Headache                             |                                                                                                                   |  |  |  |  |
| 26.4 Photophobia                          |                                                                                                                   |  |  |  |  |
| Cognitive sequelae                        |                                                                                                                   |  |  |  |  |
| 27.1 Difficulties in concentrating        |                                                                                                                   |  |  |  |  |
| 27.2 Impaired memory                      |                                                                                                                   |  |  |  |  |
| 27.3 Impaired attention                   |                                                                                                                   |  |  |  |  |
| 27.4 Mood changes                         |                                                                                                                   |  |  |  |  |
| 27.5 Irritability                         |                                                                                                                   |  |  |  |  |
| 27.6 Anxiety/depression                   |                                                                                                                   |  |  |  |  |
| 27.7 Other                                |                                                                                                                   |  |  |  |  |

| Other Symptoms              |  |  |  |  |
|-----------------------------|--|--|--|--|
| 28.1 Hair loss              |  |  |  |  |
| 28.2 Menstrual disturbances |  |  |  |  |
| 28.3 Others                 |  |  |  |  |

## Post-non-SARS-CoV-2 infection symptom assessment questionnaire

|                                                                                                                                     |                                 |  |  |  |  |
|-------------------------------------------------------------------------------------------------------------------------------------|---------------------------------|--|--|--|--|
| 29. How many days has the child not attended school/kindergarten after recovering from the infection because of the above symptoms? |                                 |  |  |  |  |
| 30. How many times has the child visited the family doctor after recovering from infection?                                         |                                 |  |  |  |  |
| 31. Has the child visited a specialist after recovering from infection?                                                             |                                 |  |  |  |  |
|                                                                                                                                     | What kind of specialist? Why?   |  |  |  |  |
| <b>Examination</b>                                                                                                                  |                                 |  |  |  |  |
| 32. What studies have been performed after recovery from acute infection?                                                           |                                 |  |  |  |  |
| 32.1 Laboratory exams                                                                                                               |                                 |  |  |  |  |
|                                                                                                                                     | - F.B.C.                        |  |  |  |  |
|                                                                                                                                     | - CRP/IL-6                      |  |  |  |  |
|                                                                                                                                     | - Urine analysis                |  |  |  |  |
|                                                                                                                                     | - Creatinine/urea               |  |  |  |  |
|                                                                                                                                     | - ALAT/ASAT                     |  |  |  |  |
|                                                                                                                                     | - Antibodies against SARS-CoV-2 |  |  |  |  |
|                                                                                                                                     | - Others                        |  |  |  |  |
| 32.2 Imaging exams                                                                                                                  |                                 |  |  |  |  |
|                                                                                                                                     | - X-ray                         |  |  |  |  |
|                                                                                                                                     | - USG                           |  |  |  |  |
|                                                                                                                                     | - Others                        |  |  |  |  |
