# Supplementary material for: Comparison of Persistent Symptoms After COVID-19 and Other Non-SARS-CoV-2 Infections in Children
Source: Frontiers journal article supplement (doi:10.3389/fped.2021.752385), 2021-10-29
Supplement: Data_Sheet_2.PDF [file Data_Sheet_2.PDF]

## Post-COVID-19 symptom assessment questionnaire

| Part I: General information, the acute disease phase |                                                                                                                                                                                                                                                                                                            |                                                                                                                                                                   |  |       |
|------------------------------------------------------|------------------------------------------------------------------------------------------------------------------------------------------------------------------------------------------------------------------------------------------------------------------------------------------------------------|-------------------------------------------------------------------------------------------------------------------------------------------------------------------|--|-------|
| 1.                                                   | Family doctor, telephone number                                                                                                                                                                                                                                                                            |                                                                                                                                                                   |  |       |
| 2.                                                   | Date of consultation                                                                                                                                                                                                                                                                                       |                                                                                                                                                                   |  |       |
| 3.                                                   | Patient number                                                                                                                                                                                                                                                                                             |                                                                                                                                                                   |  |       |
| 4.                                                   | Age                                                                                                                                                                                                                                                                                                        | Months                                                                                                                                                            |  | Years |
| 5.                                                   | Sex                                                                                                                                                                                                                                                                                                        | Female                                                                                                                                                            |  | Male  |
| 6.                                                   | Day of first symptoms with COVID-19?                                                                                                                                                                                                                                                                       |                                                                                                                                                                   |  |       |
| 7.                                                   | Does the child have any comorbidities?<br>(Rheumatological,                      cardiological,                      respiratory,<br>immunodeficiency, diabetes etc.)                                                                                                                                      | Yes ( <i>please specify</i> )                                                                                                                                     |  |       |
|                                                      |                                                                                                                                                                                                                                                                                                            | No                                                                                                                                                                |  |       |
| 8.                                                   | Is the child taking medication to treat any chronic diseases?                                                                                                                                                                                                                                              | Yes ( <i>please specify</i> )                                                                                                                                     |  |       |
|                                                      |                                                                                                                                                                                                                                                                                                            | No                                                                                                                                                                |  |       |
| 9.                                                   | Has vaccination been completed following the Latvian immunisation calendar?                                                                                                                                                                                                                                | Full immunisation                                                                                                                                                 |  |       |
|                                                      |                                                                                                                                                                                                                                                                                                            | Please clarify:<br>did the child receive the BCG vaccination?                                                                                                     |  |       |
|                                                      |                                                                                                                                                                                                                                                                                                            | Please clarify:<br>Did the child receive the MMR vaccination?                                                                                                     |  |       |
|                                                      |                                                                                                                                                                                                                                                                                                            | Partial immunisation                                                                                                                                              |  |       |
|                                                      |                                                                                                                                                                                                                                                                                                            | No vaccination                                                                                                                                                    |  |       |
| 10.                                                  | Has the child received immunisation against influenza for this flu season?                                                                                                                                                                                                                                 | Yes                                                                                                                                                               |  |       |
|                                                      |                                                                                                                                                                                                                                                                                                            | No                                                                                                                                                                |  |       |
| 11.                                                  | Date of COVID-19 test (date of positive response)                                                                                                                                                                                                                                                          |                                                                                                                                                                   |  |       |
| 12.                                                  | Was repeated testing carried out (date/result)?                                                                                                                                                                                                                                                            |                                                                                                                                                                   |  |       |
|                                                      | <b>Interview</b> with Mother/ Father/Other<br><br><b>Mother</b> – Basic education/Secondary education/ Higher education/Unfinished higher education/ Vocational education.<br><br><b>Father</b> – Basic education/Secondary education/ Higher education/Unfinished higher education/ Vocational education. | <b>Mother</b> – Married /Living together / Divorced /Other family/Separated<br><br><b>Father</b> – Married /Living together / Divorced/ Other family / Separated  |  |       |
| 13.                                                  | 13.1 Most common symptoms                                                                                                                                                                                                                                                                                  | Fever (temperature measured axillary):                                                                                                                            |  |       |
|                                                      |                                                                                                                                                                                                                                                                                                            | <div style="margin-left: 20px;"> <input type="radio"/> 37,5 – 38,0 °C<br/> <input type="radio"/> 38,1 – 39,0 °C<br/> <input type="radio"/> 39,0 °C         </div> |  |       |
|                                                      |                                                                                                                                                                                                                                                                                                            | Cough                                                                                                                                                             |  |       |
|                                                      |                                                                                                                                                                                                                                                                                                            | Sore throat                                                                                                                                                       |  |       |
|                                                      |                                                                                                                                                                                                                                                                                                            | Sneezing                                                                                                                                                          |  |       |
|                                                      |                                                                                                                                                                                                                                                                                                            | Shortness of breath                                                                                                                                               |  |       |
|                                                      |                                                                                                                                                                                                                                                                                                            | Wheezing                                                                                                                                                          |  |       |

## Post-COVID-19 symptom assessment questionnaire

|  |                     |                        |  |
|--|---------------------|------------------------|--|
|  | 13.2 Other symptoms | Muscle pain            |  |
|  |                     | Fatigue                |  |
|  |                     | Headache               |  |
|  |                     | Rhinorrhoea            |  |
|  |                     | Stuffy nose            |  |
|  |                     | Loss of taste/smell    |  |
|  |                     | Tachypnoea             |  |
|  |                     | Tachycardia            |  |
|  |                     | Oxygen saturation <92% |  |
|  |                     | Abdominal pain         |  |
|  |                     | Diarrhoea              |  |
|  |                     | Vomiting               |  |
|  |                     | Nausea                 |  |
|  |                     | Other                  |  |

| Epidemiological History                                     |                                                                      |                                                                                                                                                                                                                                                                      |     |     |
|-------------------------------------------------------------|----------------------------------------------------------------------|----------------------------------------------------------------------------------------------------------------------------------------------------------------------------------------------------------------------------------------------------------------------|-----|-----|
| <b>14.</b>                                                  | 14.1                                                                 | Data about travelling in the last 14 days.                                                                                                                                                                                                                           | Yes |     |
|                                                             |                                                                      |                                                                                                                                                                                                                                                                      | No  |     |
|                                                             | 14.2                                                                 | Has been in contact with COVID-19 virus RNA positive patient in the last 14 days.                                                                                                                                                                                    | Yes |     |
|                                                             |                                                                      |                                                                                                                                                                                                                                                                      | No  |     |
|                                                             | 14.3                                                                 | Has been in contact with a person who has been tested for COVID-19, with an unknown test result.                                                                                                                                                                     | Yes |     |
|                                                             |                                                                      |                                                                                                                                                                                                                                                                      | No  |     |
|                                                             | 14.4                                                                 | Has been in contact with a person with fever and/or respiratory symptoms (children may also have gastrointestinal symptoms) and contact with epidemiological communities where there have been laboratory-confirmed cases of COVID-19 infection in the last 14 days. | Yes |     |
|                                                             |                                                                      |                                                                                                                                                                                                                                                                      | No  |     |
|                                                             | 14.5                                                                 | Has been in contact with group cases (more than 2 cases of fever and/or respiratory symptoms via, for example, families, offices, school classes and other small communities in the last 14 days).                                                                   | Yes |     |
|                                                             |                                                                      |                                                                                                                                                                                                                                                                      | No  |     |
|                                                             | 14.6                                                                 | Patient is from a care centre with laboratory-conformed cases of COVID-19 infection over the past 14 days.                                                                                                                                                           | Yes |     |
|                                                             |                                                                      |                                                                                                                                                                                                                                                                      | No  |     |
| Laboratory/radiological exams performed at outpatient stage |                                                                      |                                                                                                                                                                                                                                                                      |     |     |
| <b>15.</b>                                                  | Full blood count                                                     |                                                                                                                                                                                                                                                                      | Yes |     |
|                                                             |                                                                      |                                                                                                                                                                                                                                                                      | No  |     |
|                                                             | Were there any abnormalities?                                        |                                                                                                                                                                                                                                                                      |     |     |
|                                                             | C-reactive protein, mg/L                                             |                                                                                                                                                                                                                                                                      |     | Yes |
|                                                             |                                                                      |                                                                                                                                                                                                                                                                      |     | No  |
|                                                             | IL-6, pg/mL                                                          |                                                                                                                                                                                                                                                                      |     | Yes |
|                                                             |                                                                      |                                                                                                                                                                                                                                                                      |     | No  |
|                                                             | ALAT, ASAT, U/L, Urea, mmol/L, Creatinine, umol/L                    |                                                                                                                                                                                                                                                                      |     | Yes |
|                                                             |                                                                      |                                                                                                                                                                                                                                                                      |     | No  |
|                                                             | CK-MB, ng/mL, LDH, U/L                                               |                                                                                                                                                                                                                                                                      |     | Yes |
|                                                             |                                                                      |                                                                                                                                                                                                                                                                      |     | No  |
|                                                             | RTG thoracis or other radiological exams, or functional examinations |                                                                                                                                                                                                                                                                      |     | Yes |
|                                                             |                                                                      |                                                                                                                                                                                                                                                                      |     | No  |

## Post-COVID-19 symptom assessment questionnaire

|                                               |                                                     |                                       |
|-----------------------------------------------|-----------------------------------------------------|---------------------------------------|
|                                               | D-dimer, mg/L FEU, ESR, mm/h, Creatininkinasis, U/L | Yes                                   |
|                                               |                                                     | No                                    |
|                                               | Ferritin, ng/mL                                     | Yes                                   |
|                                               |                                                     | No                                    |
|                                               | Urine analysis                                      | Yes                                   |
|                                               |                                                     | No                                    |
|                                               | Other examinations                                  | Yes                                   |
|                                               |                                                     | No                                    |
| <b>Treatment received at outpatient stage</b> |                                                     |                                       |
| <b>16. Type of treatment</b>                  |                                                     | How many days did the treatment last? |
| P/o rehydration                               |                                                     |                                       |
| Antipyretic therapy                           |                                                     |                                       |
| Inhalations                                   |                                                     |                                       |
| Antibacterial therapy                         |                                                     |                                       |
| Other                                         |                                                     |                                       |

| Part II: COVID-19 patient follow-up                                                                      |                         |                     |                   |                    |                    |
|----------------------------------------------------------------------------------------------------------|-------------------------|---------------------|-------------------|--------------------|--------------------|
| 17. Did the child have any other acute infections following COVID-19?                                    |                         | 1–3-month follow-up | 6-month follow-up | 12-month follow-up | 24-month follow-up |
| Date of consultation                                                                                     |                         |                     |                   |                    |                    |
| Yes                                                                                                      | Please specify          |                     |                   |                    |                    |
| No                                                                                                       |                         |                     |                   |                    |                    |
| 17.1 Received treatment during illness                                                                   |                         |                     |                   |                    |                    |
|                                                                                                          | - Antibacterial therapy |                     |                   |                    |                    |
|                                                                                                          | - P/o rehydration       |                     |                   |                    |                    |
|                                                                                                          | - Antipyretic therapy   |                     |                   |                    |                    |
|                                                                                                          | - Inhalations           |                     |                   |                    |                    |
|                                                                                                          | - Other                 |                     |                   |                    |                    |
| 18. What kind of medication/vitamins does the child receive daily?                                       |                         |                     |                   |                    |                    |
| 19. Has the child received a vaccine against influenza in the autumn/winter season 2020/2021; 2021/2022? |                         |                     |                   |                    |                    |

## Post-COVID-19 symptom assessment questionnaire

|                                                                          |                                   |  |  |  |  |
|--------------------------------------------------------------------------|-----------------------------------|--|--|--|--|
| 20. Does the child have any persistent symptoms in the wake of COVID-19? |                                   |  |  |  |  |
| <b>Catarrhal symptoms</b>                                                |                                   |  |  |  |  |
| 20.1 Elevated body temperature (axillary)                                |                                   |  |  |  |  |
|                                                                          | - How many degrees (C°)?          |  |  |  |  |
|                                                                          | - How often was the T measured?   |  |  |  |  |
| 20.2 Cough                                                               |                                   |  |  |  |  |
| 20.3 Sore throat                                                         |                                   |  |  |  |  |
| 20.4 Wheezing                                                            |                                   |  |  |  |  |
| 20.5 Rhinorrhoea                                                         |                                   |  |  |  |  |
| 20.6 Shortness of breath                                                 |                                   |  |  |  |  |
|                                                                          | - In a resting state              |  |  |  |  |
|                                                                          | - While doing physical activities |  |  |  |  |
| 20.7 Enlarged lymph nodes                                                |                                   |  |  |  |  |
| <b>Otorhinolaryngological sequelae</b>                                   |                                   |  |  |  |  |
| 20.8 Difficulty swallowing                                               |                                   |  |  |  |  |
| 20.9 Voice changes                                                       |                                   |  |  |  |  |
| 20.10 Speech disturbances                                                |                                   |  |  |  |  |
| 20.11 Tinnitus                                                           |                                   |  |  |  |  |
| <b>Cardiovascular sequelae</b>                                           |                                   |  |  |  |  |
| 20.12 Heart rhythm disturbances (including tachycardia)                  |                                   |  |  |  |  |
| 20.13 Orthostatic intolerance                                            |                                   |  |  |  |  |
| 20.14 Tachypnoea                                                         |                                   |  |  |  |  |
| <b>Gastrointestinal sequelae</b>                                         |                                   |  |  |  |  |
| 20.15 Diarrhoea                                                          |                                   |  |  |  |  |
| 20.16 Vomiting/nausea                                                    |                                   |  |  |  |  |

## Post-COVID-19 symptom assessment questionnaire

|                                                  |                                                                                                                   |  |  |  |  |
|--------------------------------------------------|-------------------------------------------------------------------------------------------------------------------|--|--|--|--|
| 20.17 Loss of appetite                           |                                                                                                                   |  |  |  |  |
| 20.18 Body weight changes                        |                                                                                                                   |  |  |  |  |
| <b>Musculoskeletal sequelae</b>                  |                                                                                                                   |  |  |  |  |
| 20.19 Muscle pain                                |                                                                                                                   |  |  |  |  |
| 20.20 Muscle spasms                              |                                                                                                                   |  |  |  |  |
| 20.21 Joint pain                                 |                                                                                                                   |  |  |  |  |
| 20.22 Stiffness                                  |                                                                                                                   |  |  |  |  |
| <b>Exercise intolerance</b>                      |                                                                                                                   |  |  |  |  |
| 20.23 Exercise Intolerance                       |                                                                                                                   |  |  |  |  |
|                                                  | - Which physical activities can't be done?                                                                        |  |  |  |  |
|                                                  | - How long can physical activity be tolerated (minutes)?                                                          |  |  |  |  |
|                                                  | - Does the physical activity provoke increased fatigue/sleepiness?                                                |  |  |  |  |
|                                                  | - Do the symptoms disappear when lying down?                                                                      |  |  |  |  |
|                                                  | - Is it hard to walk for longer than 15 minutes?                                                                  |  |  |  |  |
|                                                  | - Is it hard to get up more than two flights of stairs?                                                           |  |  |  |  |
|                                                  | - Is there any physical activity that is more difficult than previously?                                          |  |  |  |  |
| <b>Day-to-day activities and sleep disorders</b> |                                                                                                                   |  |  |  |  |
| 20.24 Increased fatigue                          |                                                                                                                   |  |  |  |  |
|                                                  | - Are there any provoking factors which amplify fatigue?                                                          |  |  |  |  |
|                                                  | - How many hours a night does the child sleep?                                                                    |  |  |  |  |
|                                                  | - Is the child tired in the morning, despite a good night's sleep?                                                |  |  |  |  |
|                                                  | - Are there any day-to-day activities (dressing, washing etc.) that are more difficult now than they were before? |  |  |  |  |
| 20.25 Night sweating                             |                                                                                                                   |  |  |  |  |
| <b>Neurological sequelae</b>                     |                                                                                                                   |  |  |  |  |
| 20.26 Loss of taste and/or smell                 |                                                                                                                   |  |  |  |  |

## Post-COVID-19 symptom assessment questionnaire

|                                     |  |  |  |  |
|-------------------------------------|--|--|--|--|
| 20.27 Dizziness                     |  |  |  |  |
| 20.28 Headache                      |  |  |  |  |
| 20.29 Photophobia                   |  |  |  |  |
| <b>Cognitive sequelae</b>           |  |  |  |  |
| 20.30 Difficulties in concentrating |  |  |  |  |
| 20.31 Impaired memory               |  |  |  |  |
| 20.32 Impaired attention            |  |  |  |  |
| 20.33 Mood changes                  |  |  |  |  |
| 20.34 Irritability                  |  |  |  |  |
| 20.35 Anxiety/depression            |  |  |  |  |
| 20.36 Other                         |  |  |  |  |

|                                                                                                                                |                               |  |  |  |
|--------------------------------------------------------------------------------------------------------------------------------|-------------------------------|--|--|--|
| <b>Other Symptoms</b>                                                                                                          |                               |  |  |  |
| 20.37 Hair loss                                                                                                                |                               |  |  |  |
| 20.38 Menstrual disturbances                                                                                                   |                               |  |  |  |
| 20.39 Others                                                                                                                   |                               |  |  |  |
| 21. How many days has the child not attended school/kindergarten after recovering from COVID-19 because of the above symptoms? |                               |  |  |  |
| 22. How many times has the child visited the family doctor after recovering from COVID-19?                                     |                               |  |  |  |
| 23. Has the child visited a specialist after recovering from COVID-19?                                                         |                               |  |  |  |
|                                                                                                                                | What kind of specialist? Why? |  |  |  |
| <b>Examination</b>                                                                                                             |                               |  |  |  |
| 24. What studies have been performed after recovery from COVID-19?                                                             |                               |  |  |  |
| 24.1 Laboratory exams                                                                                                          |                               |  |  |  |
|                                                                                                                                | - F.B.C.                      |  |  |  |

## Post-COVID-19 symptom assessment questionnaire

|                    |                                 |  |  |  |  |
|--------------------|---------------------------------|--|--|--|--|
|                    | - CRP/IL-6                      |  |  |  |  |
|                    | - Urine analysis                |  |  |  |  |
|                    | - Creatinine/urea               |  |  |  |  |
|                    | - ALAT/ASAT                     |  |  |  |  |
|                    | - Antibodies against SARS-CoV-2 |  |  |  |  |
|                    | - Others                        |  |  |  |  |
| 24.2 Imaging exams |                                 |  |  |  |  |
|                    | - X-ray                         |  |  |  |  |
|                    | - USG                           |  |  |  |  |
|                    | - Others                        |  |  |  |  |
